# Supplementary material for: Satellite-based modeling of wetland methane emissions on a global scale (SatWetCH4 1.0)
Source: Copernicus journal article supplement (doi:10.5194/gmd-18-863-2025), 2025-02-14
Supplement: Supplementary file 1 [file gmd-18-863-2025-supplement.pdf]

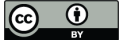

*Supplement of*

## **Satellite-based modeling of wetland methane emissions on a global scale (SatWetCH4 1.0)**

**Juliette Bernard et al.**

*Correspondence to:* Juliette Bernard ([juliette.bernard@obspm.fr](mailto:juliette.bernard@obspm.fr))

The copyright of individual parts of the supplement might differ from the article licence.

## S1 Information about in situ fluxes and ancillary data

**Table S1.** Methane eddy covariance flux data sources

| Source          | Data access                                                                                                                                                                                                                                                                                                                                | Accessed                      |
|-----------------|--------------------------------------------------------------------------------------------------------------------------------------------------------------------------------------------------------------------------------------------------------------------------------------------------------------------------------------------|-------------------------------|
| FLUX-NET CH4    | <a href="https://fluxnet.org/data/fluxnet-ch4-community-product/">https://fluxnet.org/data/fluxnet-ch4-community-product/</a>                                                                                                                                                                                                              | 1 <sup>rst</sup> August 2022  |
| AmeriFlux       | <a href="https://ameriflux.lbl.gov/sites/site-search/">https://ameriflux.lbl.gov/sites/site-search/</a>                                                                                                                                                                                                                                    | 3 <sup>rd</sup> October 2022  |
| EuroFlux        | <a href="http://www.europe-fluxdata.eu/home/data/request-data">http://www.europe-fluxdata.eu/home/data/request-data</a>                                                                                                                                                                                                                    | Novembre 2022                 |
| P. Gnanamoorthy | Personal exchanges                                                                                                                                                                                                                                                                                                                         | 29 <sup>th</sup> Octobre 2022 |
| C. Helfter      | <a href="https://catalogue.ceh.ac.uk/documents/d366ed40-af8c-42be-86f2-bb90b11a659e">https://catalogue.ceh.ac.uk/documents/d366ed40-af8c-42be-86f2-bb90b11a659e</a><br><a href="https://catalogue.ceh.ac.uk/documents/2170ebd0-7e6f-4871-97d9-1d42e210468f">https://catalogue.ceh.ac.uk/documents/2170ebd0-7e6f-4871-97d9-1d42e210468f</a> | 10 <sup>th</sup> October 2022 |

**Table S2:** List of methane eddy covariance flux sites used in this study

| site ID | data source | lat  | lon    | start | end  | monthly data | DOI                                                                                     |
|---------|-------------|------|--------|-------|------|--------------|-----------------------------------------------------------------------------------------|
| US-A10  | FLUXNET     | 71.3 | -156.6 | 2012  | 2018 | 21           | <a href="https://doi.org/10.18140/FLX/1669662">https://doi.org/10.18140/FLX/1669662</a> |
| US-Beo  | FLUXNET     | 71.3 | -156.6 | 2013  | 2014 | 16           | No DOI available                                                                        |
| US-Bes  | FLUXNET     | 71.3 | -156.6 | 2013  | 2015 | 27           | No DOI available                                                                        |
| US-NGB  | FLUXNET     | 71.3 | -156.6 | 2012  | 2018 | 39           | <a href="https://doi.org/10.18140/FLX/1669687">https://doi.org/10.18140/FLX/1669687</a> |
| RU-Cok  | FLUXNET     | 70.8 | 147.5  | 2008  | 2016 | 21           | <a href="https://doi.org/10.18140/FLX/1669656">https://doi.org/10.18140/FLX/1669656</a> |
| US-A03  | FLUXNET     | 70.5 | -149.9 | 2015  | 2018 | 28           | <a href="https://doi.org/10.18140/FLX/1669661">https://doi.org/10.18140/FLX/1669661</a> |
| US-Atq  | FLUXNET     | 70.5 | -157.4 | 2013  | 2016 | 27           | <a href="https://doi.org/10.18140/FLX/1669663">https://doi.org/10.18140/FLX/1669663</a> |
| RU-Ch2  | FLUXNET     | 68.6 | 161.4  | 2014  | 2016 | 26           | <a href="https://doi.org/10.18140/FLX/1669654">https://doi.org/10.18140/FLX/1669654</a> |
| US-ICs  | AmeriFlux   | 68.6 | -149.3 | 2007  | 2021 | 52           | <a href="https://doi.org/10.17190/AMF/1246130">https://doi.org/10.17190/AMF/1246130</a> |
| US-Ivo  | FLUXNET     | 68.5 | -155.8 | 2013  | 2016 | 41           | <a href="https://doi.org/10.18140/FLX/1669679">https://doi.org/10.18140/FLX/1669679</a> |
| SE-St1  | EuroFlux    | 68.4 | 19.1   | 2012  | 2019 | 70           | No DOI available                                                                        |
| FI-Lom  | FLUXNET     | 68   | 24.2   | 2006  | 2010 | 60           | <a href="https://doi.org/10.18140/FLX/1669638">https://doi.org/10.18140/FLX/1669638</a> |
| US-Uaf  | FLUXNET     | 64.9 | -147.9 | 2011  | 2018 | 48           | <a href="https://doi.org/10.18140/FLX/1669701">https://doi.org/10.18140/FLX/1669701</a> |
| US-NGC  | FLUXNET     | 64.9 | -163.7 | 2017  | 2018 | 8            | <a href="https://doi.org/10.18140/FLX/1669688">https://doi.org/10.18140/FLX/1669688</a> |
| US-BZF  | AmeriFlux   | 64.7 | -148.3 | 2011  | 2022 | 56           | <a href="https://doi.org/10.17190/AMF/1756433">https://doi.org/10.17190/AMF/1756433</a> |
| US-BZB  | AmeriFlux   | 64.7 | -148.3 | 2011  | 2022 | 59           | <a href="https://doi.org/10.17190/AMF/1773401">https://doi.org/10.17190/AMF/1773401</a> |
| US-BZo  | AmeriFlux   | 64.7 | -148.3 | 2018  | 2022 | 30           | <a href="https://doi.org/10.17190/AMF/1846662">https://doi.org/10.17190/AMF/1846662</a> |
| SE-Deg  | EuroFlux    | 64.2 | 19.6   | 2014  | 2020 | 76           | No DOI available                                                                        |
| FI-Si2  | FLUXNET     | 61.8 | 24.2   | 2012  | 2016 | 34           | <a href="https://doi.org/10.18140/FLX/1669639">https://doi.org/10.18140/FLX/1669639</a> |
| FI-Sii  | EuroFlux    | 61.8 | 24.2   | 2008  | 2020 | 130          | No DOI available                                                                        |
| CA-SCB  | FLUXNET     | 61.3 | -121.3 | 2014  | 2017 | 30           | <a href="https://doi.org/10.18140/FLX/1669613">https://doi.org/10.18140/FLX/1669613</a> |
| US-KPL  | AmeriFlux   | 60.5 | -150.5 | 2021  | 2021 | 7            | <a href="https://doi.org/10.17190/AMF/1865478">https://doi.org/10.17190/AMF/1865478</a> |
| DE-Hte  | FLUXNET     | 54.2 | 12.2   | 2011  | 2018 | 85           | <a href="https://doi.org/10.18140/FLX/1669634">https://doi.org/10.18140/FLX/1669634</a> |
| DE-Zrk  | FLUXNET     | 53.9 | 12.9   | 2013  | 2018 | 63           | <a href="https://doi.org/10.18140/FLX/1669636">https://doi.org/10.18140/FLX/1669636</a> |
| DE-UtM  | EuroFlux    | 52.5 | 8.8    | 2016  | 2017 | 19           | No DOI available                                                                        |

|        |                 |       |        |      |      |     |                                                                                                                                         |
|--------|-----------------|-------|--------|------|------|-----|-----------------------------------------------------------------------------------------------------------------------------------------|
| CA-DBB | AmeriFlux       | 49.1  | -123   | 2014 | 2020 | 58  | <a href="https://doi.org/10.17190/AMF/1543378">https://doi.org/10.17190/AMF/1543378</a>                                                 |
| CA-DB2 | AmeriFlux       | 49.1  | -123   | 2019 | 2020 | 13  | <a href="https://doi.org/10.17190/AMF/1881564">https://doi.org/10.17190/AMF/1881564</a>                                                 |
| DE-SfN | FLUXNET         | 47.8  | 11.1   | 2012 | 2014 | 29  | <a href="https://doi.org/10.18140/FLX/1669635">https://doi.org/10.18140/FLX/1669635</a>                                                 |
| US-Los | AmeriFlux       | 46.1  | -90    | 2000 | 2022 | 91  | <a href="https://doi.org/10.17190/AMF/1246071">https://doi.org/10.17190/AMF/1246071</a>                                                 |
| US-ALQ | AmeriFlux       | 46    | -89.6  | 2015 | 2022 | 35  | <a href="https://doi.org/10.17190/AMF/1480323">https://doi.org/10.17190/AMF/1480323</a>                                                 |
| JP-BBY | FLUXNET         | 43.3  | 141.8  | 2015 | 2018 | 40  | <a href="https://doi.org/10.18140/FLX/1669646">https://doi.org/10.18140/FLX/1669646</a>                                                 |
| US-WPT | FLUXNET         | 41.5  | -83    | 2011 | 2013 | 34  | <a href="https://doi.org/10.18140/FLX/1669702">https://doi.org/10.18140/FLX/1669702</a>                                                 |
| US-MRM | FLUXNET         | 40.8  | -74    | 2012 | 2013 | 21  | No DOI available                                                                                                                        |
| US-ORv | FLUXNET         | 40    | -83    | 2011 | 2015 | 50  | <a href="https://doi.org/10.18140/FLX/1669689">https://doi.org/10.18140/FLX/1669689</a>                                                 |
| US-StJ | AmeriFlux       | 39.1  | -75.4  | 2014 | 2017 | 31  | <a href="https://doi.org/10.17190/AMF/1480316">https://doi.org/10.17190/AMF/1480316</a>                                                 |
| US-Hsm | AmeriFlux       | 38.2  | -122   | 2021 | 2022 | 10  | <a href="https://doi.org/10.17190/AMF/1890483">https://doi.org/10.17190/AMF/1890483</a>                                                 |
| US-Srr | FLUXNET         | 38.2  | -122   | 2014 | 2017 | 43  | <a href="https://doi.org/10.18140/FLX/1669694">https://doi.org/10.18140/FLX/1669694</a>                                                 |
| US-Tw1 | AmeriFlux       | 38.1  | -121.6 | 2011 | 2020 | 115 | <a href="https://doi.org/10.17190/AMF/1246147">https://doi.org/10.17190/AMF/1246147</a>                                                 |
| US-Tw5 | AmeriFlux       | 38.1  | -121.6 | 2018 | 2020 | 22  | <a href="https://doi.org/10.17190/AMF/1543380">https://doi.org/10.17190/AMF/1543380</a>                                                 |
| US-Tw4 | AmeriFlux       | 38.1  | -121.6 | 2013 | 2021 | 93  | <a href="https://doi.org/10.17190/AMF/1246151">https://doi.org/10.17190/AMF/1246151</a>                                                 |
| US-Myb | AmeriFlux       | 38    | -121.8 | 2010 | 2021 | 133 | <a href="https://doi.org/10.17190/AMF/1246139">https://doi.org/10.17190/AMF/1246139</a>                                                 |
| US-Sne | FLUXNET         | 38    | -121.8 | 2016 | 2018 | 32  | <a href="https://doi.org/10.18140/FLX/1669693">https://doi.org/10.18140/FLX/1669693</a>                                                 |
| US-EDN | AmeriFlux       | 37.6  | -122.1 | 2018 | 2019 | 20  | <a href="https://doi.org/10.17190/AMF/1543381">https://doi.org/10.17190/AMF/1543381</a>                                                 |
| ES-Pdu | EuroFlux        | 37    | -3.6   | 2014 | 2017 | 38  | <a href="https://doi.org/10.1029/2019JG005169">https://doi.org/10.1029/2019JG005169</a>                                                 |
| US-NC4 | AmeriFlux       | 35.8  | -75.9  | 2009 | 2021 | 39  | <a href="https://doi.org/10.17190/AMF/1480314">https://doi.org/10.17190/AMF/1480314</a>                                                 |
| US-HB1 | AmeriFlux       | 33.3  | -79.2  | 2019 | 2021 | 12  | <a href="https://doi.org/10.17190/AMF/1660341">https://doi.org/10.17190/AMF/1660341</a>                                                 |
| US-LA2 | FLUXNET         | 29.9  | -90.3  | 2011 | 2013 | 22  | <a href="https://doi.org/10.18140/FLX/1669681">https://doi.org/10.18140/FLX/1669681</a>                                                 |
| US-LA1 | FLUXNET         | 29.5  | -90.4  | 2011 | 2012 | 15  | <a href="https://doi.org/10.18140/FLX/1669680">https://doi.org/10.18140/FLX/1669680</a>                                                 |
| US-DPW | FLUXNET         | 28.1  | -81.4  | 2013 | 2017 | 40  | <a href="https://doi.org/10.18140/FLX/1669672">https://doi.org/10.18140/FLX/1669672</a>                                                 |
| HK-MPM | FLUXNET         | 22.5  | 114    | 2016 | 2018 | 34  | <a href="https://doi.org/10.18140/FLX/1669642">https://doi.org/10.18140/FLX/1669642</a>                                                 |
| IN-Pic | P. Gnanamoorthy | 11.4  | 79.8   | 2018 | 2020 | 8   | No DOI available                                                                                                                        |
| MY-MLM | FLUXNET         | 1.5   | 111.1  | 2014 | 2015 | 19  | <a href="https://doi.org/10.18140/FLX/1669650">https://doi.org/10.18140/FLX/1669650</a>                                                 |
| ID-Pag | FLUXNET         | -2.3  | 113.9  | 2016 | 2017 | 12  | <a href="https://doi.org/10.18140/FLX/1669643">https://doi.org/10.18140/FLX/1669643</a>                                                 |
| PE-QFR | AmeriFlux       | -3.8  | -73.3  | 2018 | 2019 | 10  | <a href="https://doi.org/10.17190/AMF/1671889">https://doi.org/10.17190/AMF/1671889</a>                                                 |
| BR-Npw | FLUXNET         | -16.5 | -56.4  | 2013 | 2016 | 30  | <a href="https://doi.org/10.18140/FLX/1669368">https://doi.org/10.18140/FLX/1669368</a>                                                 |
| BW-Gum | C. Helfter      | -19   | 22.4   | 2018 | 2020 | 26  | <a href="https://doi.org/10.5285/d366ed40-af8c-42be-86f2-bb90b11a659e">https://doi.org/10.5285/d366ed40-af8c-42be-86f2-bb90b11a659e</a> |
| BW-Nxr | C. Helfter      | -19.5 | 23.2   | 2018 | 2020 | 12  | <a href="https://doi.org/10.5285/2170ebd0-7e6f-4871-97d9-1d42e210468f">https://doi.org/10.5285/2170ebd0-7e6f-4871-97d9-1d42e210468f</a> |
| NZ-Kop | FLUXNET         | -37.4 | 175.6  | 2012 | 2015 | 48  | <a href="https://doi.org/10.18140/FLX/1669652">https://doi.org/10.18140/FLX/1669652</a>                                                 |

## S2 Monthly measurement fit

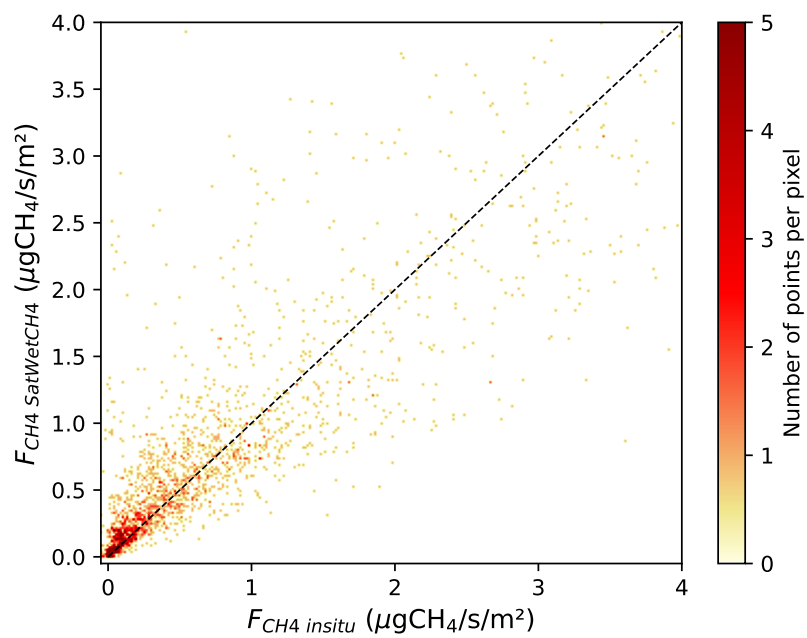

**Figure S1.** SatWetCH4 monthly modelled fluxes in function of the monthly in situ measurement, with the 1:1 dashed line.

### S3 Comparison of ERA5 data with in situ data

#### S3.1 Temperature

5 We study the variable *Soil temperature level 2 (lay2)* from ERA5, which represents soil temperature in 7-28 cm soil layer. We compare it to soil temperature measurements available at the sites. Out of the 58 sites, 42 are equipped with temperature probes. If multiple probes are available, we choose the one closest to the surface. For ERA5, we select the nearest pixel to the site.

10 ERA5 *lay2* temperature is consistent with in situ measurements. The comparison is shown in Fig.S2. Each site is represented by a point. In Fig.S2.a., the temporal correlation between ERA5 temperature and observations is strong:  $r$  is bigger than 0.9 for 37 out of 42 sites. A RMSD lower than 2 °K is shown for 39 out of 42 sites on Fig.S2.b. ERA5 temperatures have a good spatial correlation on average with observations, as Fig.S2.c. shows a linear relationship between mean in situ temperatures and mean ERA5 *lay2* temperatures. There is an RMSD of 1.8 °K between the observation and ERA5 means. Finally, Fig.S2.d. indicates a good reproduction of the seasonal variations for ERA5 *lay2*: the RMSD between the sites standard deviations of observations and ERA5 is 1.2 °K.

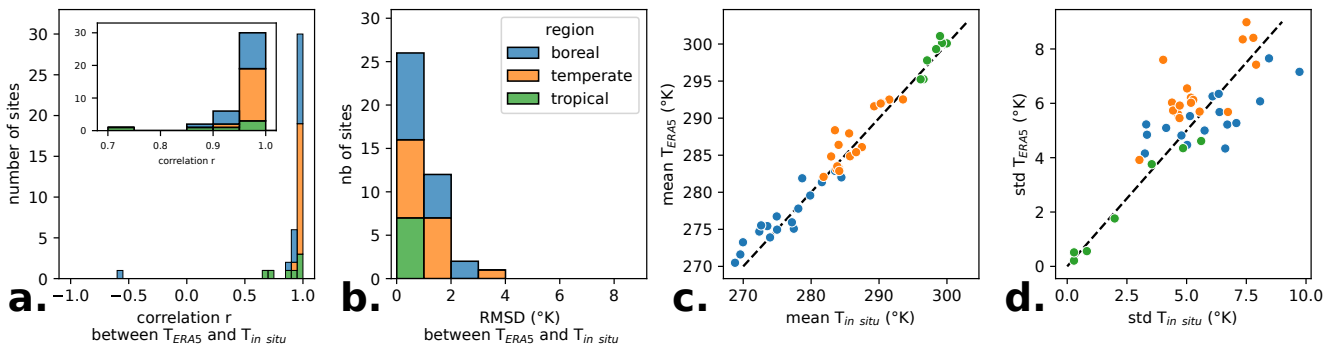

**Figure S2.** Comparison of 0.25° ERA5 *lay2* temperature with in situ temperature measurements. ERA5 data consistently match local in situ measurements. **a.** Temporal correlation coefficient between ERA5 *lay2* temperature and in situ data. **b.** RMSD of ERA5 data compared to observations. **c.** Spatial pattern: mean in situ temperature for each site compared to mean of ERA5 estimates. **d.** Amplitude comparison: standard deviation of in situ temperature for each site compared to standard deviation of ERA5 estimates. In c. and d., each point represents a site.

#### S3.2 Soil Water Content (SWC)

We study the variable *SWC level 2* from ERA5, which represents Soil Water Content (SWC) in 7-28 cm soil layer. We compare it to SWC measurements available at the sites. Out of the 58 sites, 14 are equipped with SWC probes. For ERA5, we select the nearest pixel to the site.

20 ERA5 SWC 0.25° data do not consistently match local in situ measurements. Indeed, Fig.S3.a. shows an unclear temporal correlation between in situ SWC and ERA5 SWC. Fig.S3.b. indicates high RMSDs (0-30% for values around 40%) between ERA5 and local SWC measurements. Moreover, ERA5 tends to underestimate the mean SWC compared to local measurements as shown in Fig.S3.c. ERA5 highlights a significant underestimation of SWC variation amplitude by ERA5 compared to observations (Fig.S3.d.).

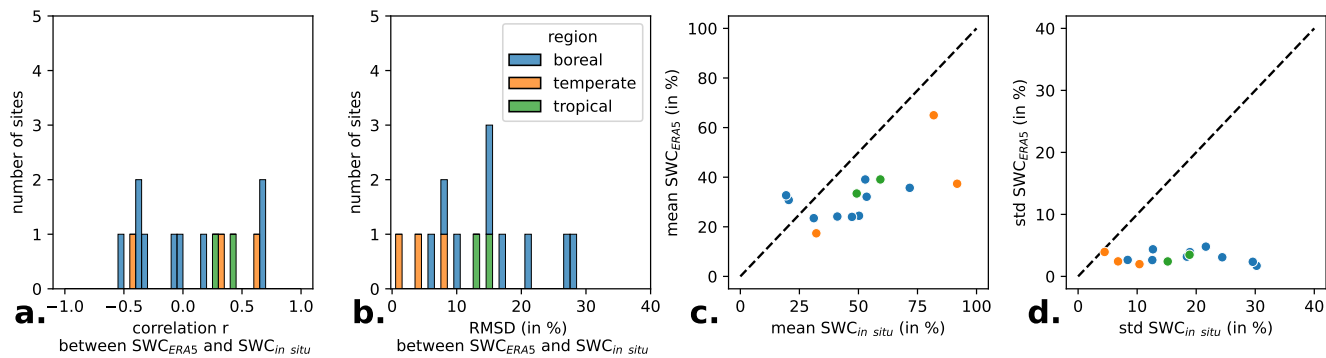

**Figure S3.** Comparison of  $0.25^\circ$  lay2 ERA5 Soil Water Content (SWC) with local in situ SWC observations. ERA5 data does not consistently match local in situ measurements. Each point represents a site. **a.** Temporal correlation between in situ SWC and ERA5 SWC. **b.** RMSD between ERA5 SWC and observed local SWC. **c.** Spatial pattern: mean in situ SWC for each site compared to mean of ERA5 SWC. **d.** Amplitude comparison: standard deviation of in situ SWC for each site compared to standard deviation of ERA5 estimates.

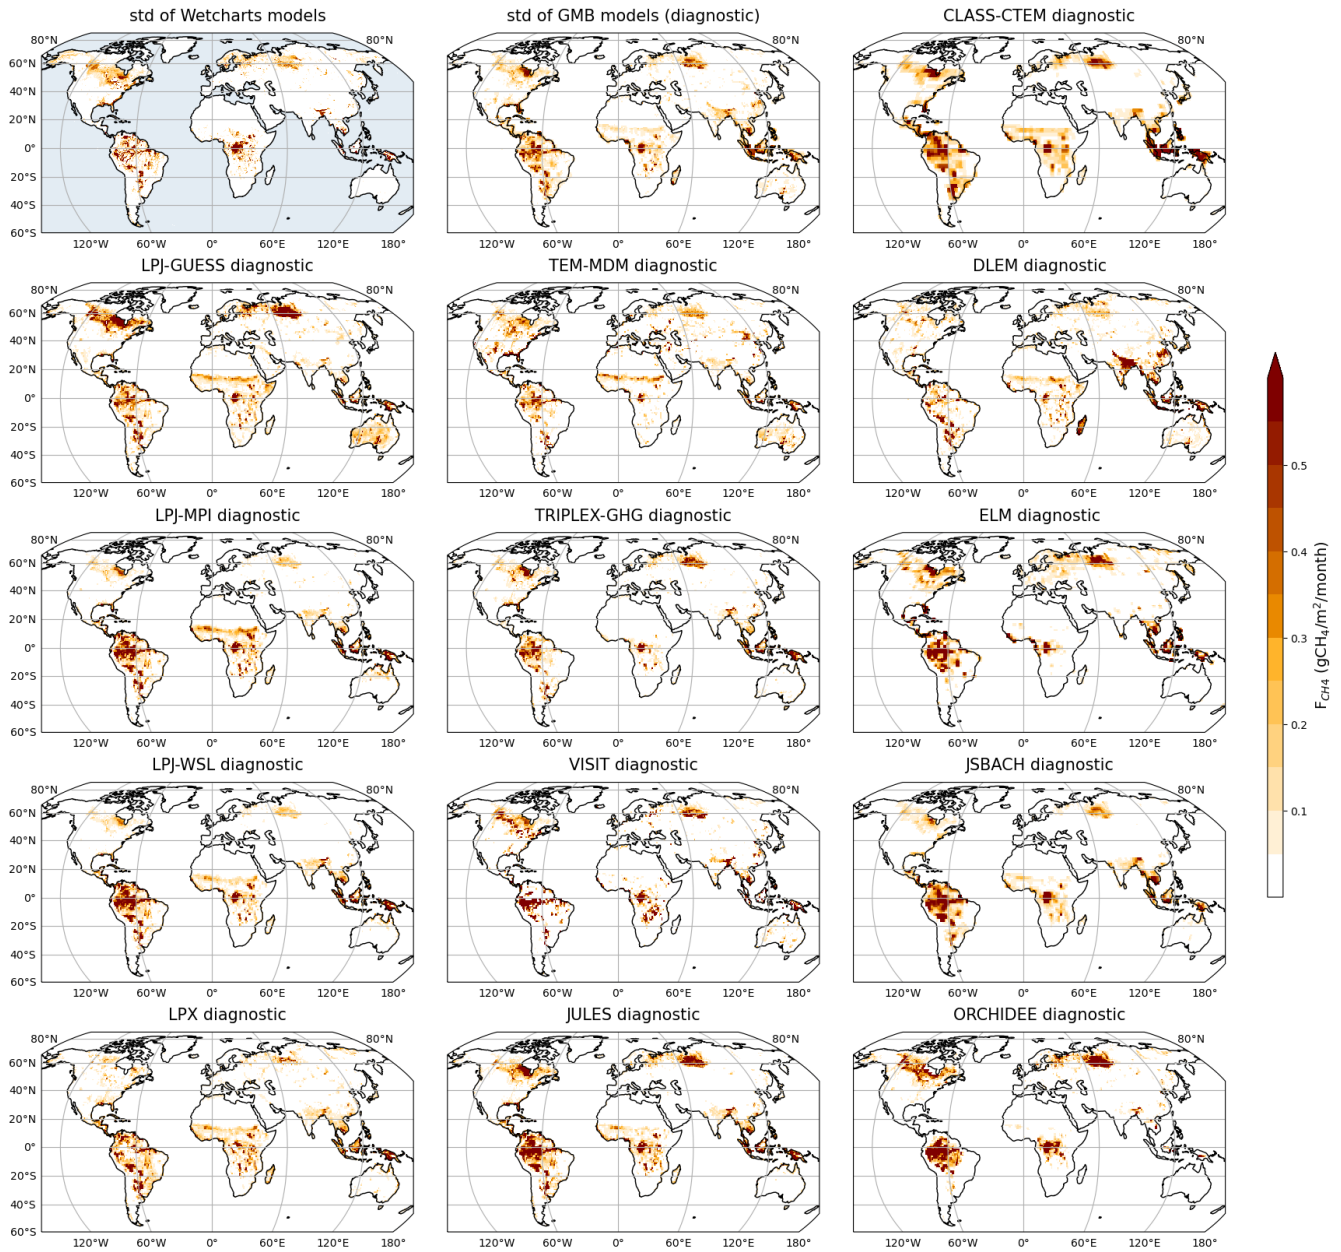

**Figure S4.** Emissions monthly mean for 2003-2018 of Land surface Models run with WAD2M for GMB (Saunois et al., 2020). Spatial patterns and intensity show considerable variability between the different GMB Land Surface Models, especially in Canada, subequatorial Africa, Siberian Lowland, and Australia.

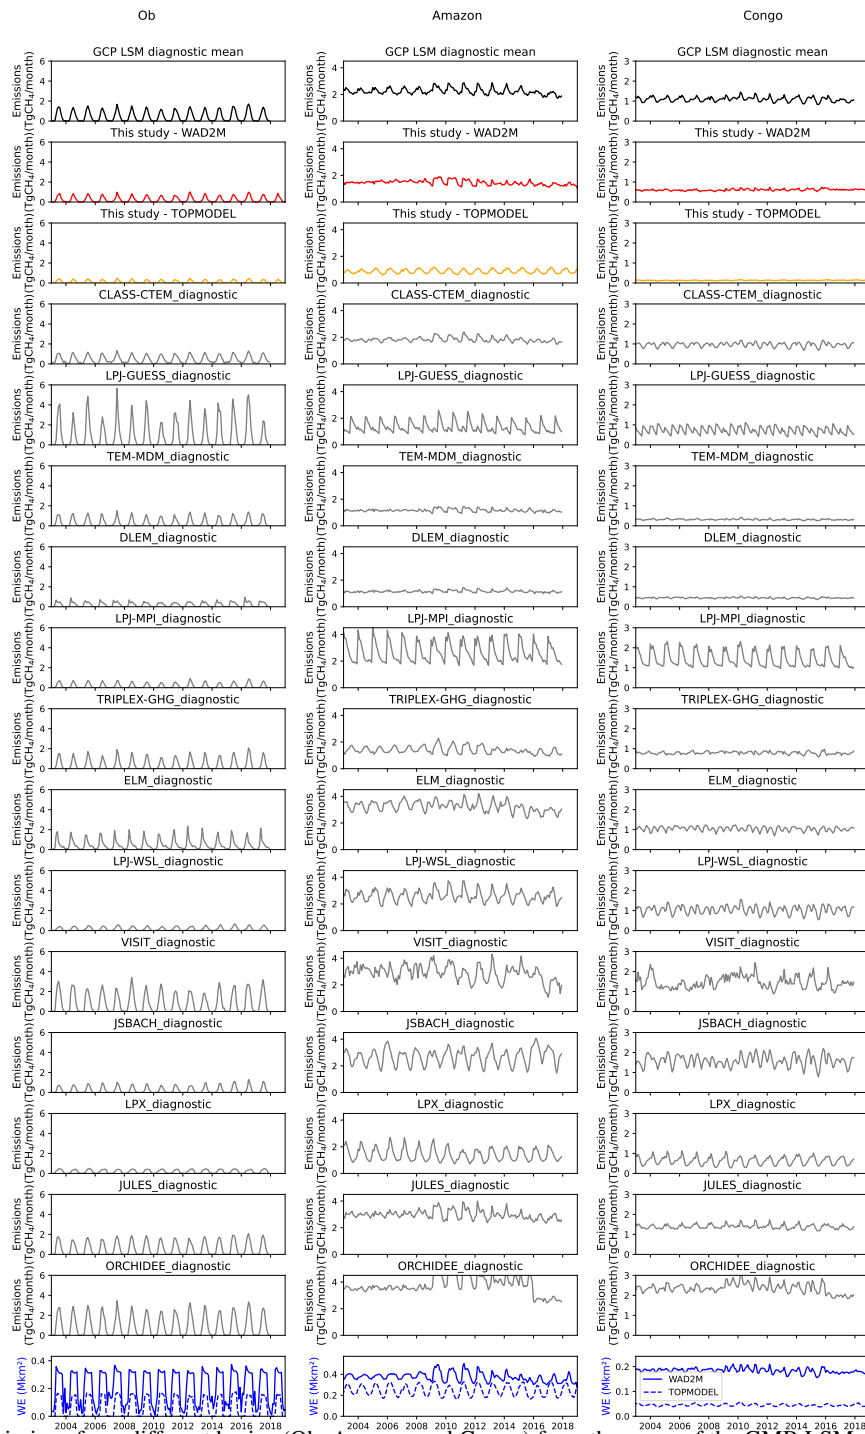

**Figure S5.** Methane emissions from different basins (Ob, Amazon and Congo) from the mean of the GMB LSM models diagnostic (black), our simulations (red), and each LSM from GMB diagnostic runs (grey). The Wetland Extent (WE) used for the runs is WAD2M and is shown in the lower graphs.



## References

- Saunois, M., Stavert, A. R., Poulter, B., Bousquet, P., Canadell, J. G., Jackson, R. B., Raymond, P. A., Dlugokencky, E. J., Houweling, S., Patra, P. K., Ciais, P., Arora, V. K., Bastviken, D., Bergamaschi, P., Blake, D. R., Brailsford, G., Bruhwiler, L., Carlson, K. M., Carrol, M., Castaldi, S., Chandra, N., Crevoisier, C., Crill, P. M., Covey, K., Curry, C. L., Etiope, G., Frankenberg, C., Gedney, N., Hegglin, M. I., Höglund-Isaksson, L., Hugelius, G., Ishizawa, M., Ito, A., Janssens-Maenhout, G., Jensen, K. M., Joos, F., Kleinen, T., Krummel, P. B., Langenfelds, R. L., Laruelle, G. G., Liu, L., Machida, T., Maksyutov, S., McDonald, K. C., McNorton, J., Miller, P. A., Melton, J. R., Morino, I., Müller, J., Murguia-Flores, F., Naik, V., Niwa, Y., Noce, S., O'Doherty, S., Parker, R. J., Peng, C., Peng, S., Peters, G. P., Prigent, C., Prinn, R., Ramonet, M., Regnier, P., Riley, W. J., Rosentreter, J. A., Segers, A., Simpson, I. J., Shi, H., Smith, S. J., Steele, L. P., Thornton, B. F., Tian, H., Tohjima, Y., Tubiello, F. N., Tsuruta, A., Viovy, N., Voulgarakis, A., Weber, T. S., van Weele, M., van der Werf, G. R., Weiss, R. F., Worthy, D., Wunch, D., Yin, Y., Yoshida, Y., Zhang, W., Zhang, Z., Zhao, Y., Zheng, B., Zhu, Q., Zhu, Q., and Zhuang, Q.: The Global Methane Budget 2000–2017, *Earth System Science Data*, 12, 1561–1623, <https://doi.org/10.5194/essd-12-1561-2020>, 2020.
